# Supplementary material for: Caution in inferring viral strategies from abundance correlations in marine metagenomes
Source: PubMed Central journal article supplement (PMC6353933; doi:10.1038/s41467-018-07950-z), 2019-01-30
Supplement: 41467_2018_7950_MOESM1_ESM.pdf [file 41467_2018_7950_MOESM1_ESM.pdf]

# Caution in inferring viral strategies from abundance correlations in marine metagenomes

Hend Alrasheed<sup>1</sup>, Rong Jin<sup>1</sup>, and Joshua S. Weitz<sup>1,2</sup>

<sup>1</sup>School of Biological Sciences and <sup>2</sup>School of Physics  
Georgia Institute of Technology, Atlanta, GA, 30332, USA

## Supplementary Materials

- Table S1: Slope correlation distributions for the genus datasets.
- Table S2: Slope correlation distributions for the phylum datasets.
- Table S3: Spearman rank correlation distributions for the genus datasets.
- Table S4: Spearman rank correlation distributions for the phylum datasets.

Table S1: Randomized confidence intervals of slope for the genus datasets. \* indicates datasets that show significant correlation at the  $p = 0.05$  level. \*\* indicates datasets that show significant correlation at the  $p = 0.01$  level.

| Host               | # of data points | Original sample |            | Randomized sample distribution |         |        |         |        |
|--------------------|------------------|-----------------|------------|--------------------------------|---------|--------|---------|--------|
|                    |                  | Slope           | $p$ -value | Median slope                   | 95% CI  |        | 99% CI  |        |
| Acholeplasma       | 27               | -0.0276         | 0.8331     | -0.0057                        | -0.2347 | 0.2700 | -0.2940 | 0.3624 |
| Atopobium          | 22               | -0.2696         | 0.1169     | -0.0011                        | -0.3258 | 0.3380 | -0.4056 | 0.4406 |
| Bacillus           | 7                | 0.1604          | 0.1269     | 0.0058                         | -0.2048 | 0.1768 | -0.2315 | 0.2104 |
| Bifidobacterium    | 19               | 0.3506          | 0.1651     | 0.0046                         | -0.4817 | 0.4805 | -0.6263 | 0.5980 |
| Brachyspira        | 7                | -0.0679         | 0.6290     | -0.0218                        | -0.1908 | 0.2590 | -0.2145 | 0.2737 |
| Burkholderia       | 20               | 0.2206          | 0.3088     | -0.0051                        | -0.3986 | 0.4131 | -0.5139 | 0.5277 |
| C.Pelagibacter**   | 36               | 0.2651          | 0.0030     | 0.0009                         | -0.1852 | 0.1826 | -0.2293 | 0.2317 |
| C.Puniceispirillum | 15               | 0.1150          | 0.6456     | -0.0012                        | -0.4591 | 0.4610 | -0.5709 | 0.5745 |
| Cellulophaga       | 6                | 0.3157          | 0.0510     | -0.0097                        | -0.2934 | 0.3343 | -0.3210 | 0.3496 |
| Clostridium        | 27               | 0.0819          | 0.3130     | 0.0008                         | -0.1625 | 0.1471 | -0.2083 | 0.1871 |
| Coprococcus        | 11               | 0.0443          | 0.7822     | 0.0016                         | -0.2821 | 0.2879 | -0.3470 | 0.3483 |
| Corynebacterium    | 7                | 0.7186          | 0.5267     | -0.0717                        | -1.8077 | 1.7605 | -1.9219 | 1.8860 |
| Croceibacter       | 24               | 0.0537          | 0.5899     | -0.0008                        | -0.1858 | 0.1900 | -0.2334 | 0.2420 |
| Desulfovibrio      | 6                | 0.3933          | 0.6670     | -0.0171                        | -1.3452 | 1.5003 | -1.4183 | 1.5905 |
| Exiguobacterium    | 21               | 0.0033          | 0.9851     | 0.0129                         | -0.3516 | 0.3118 | -0.4626 | 0.3933 |
| Flavobacterium     | 22               | 0.0463          | 0.6201     | 0.0010                         | -0.1786 | 0.1720 | -0.2271 | 0.2170 |
| Fusobacterium      | 26               | 0.1035          | 0.2143     | -0.0023                        | -0.1490 | 0.1656 | -0.1835 | 0.2174 |
| Haloferax          | 13               | -0.0046         | 0.9879     | 0.0013                         | -0.5392 | 0.5507 | -0.6696 | 0.6631 |
| Haloquadratum      | 9                | 0.0292          | 0.9403     | 0.0435                         | -0.7410 | 0.5710 | -0.8207 | 0.6908 |
| Lactobacillus      | 10               | -0.0085         | 0.8732     | -0.0012                        | -0.0896 | 0.0944 | -0.1095 | 0.1129 |
| Leptospira         | 36               | 0.0543          | 0.5468     | 0.0068                         | -0.2070 | 0.1553 | -0.2811 | 0.1970 |
| Leptotrichia       | 6                | 0.0095          | 0.9062     | 0.0074                         | -0.1186 | 0.1155 | -0.1288 | 0.1288 |
| Leuconostoc        | 28               | 0.1078          | 0.2479     | -0.0045                        | -0.1800 | 0.1821 | -0.2285 | 0.2320 |
| Magnetospirillum   | 19               | -0.4958         | 0.1582     | 0.0081                         | -0.6846 | 0.6657 | -0.8587 | 0.8290 |
| Marinomonas        | 20               | -0.0909         | 0.6871     | 0.0002                         | -0.4209 | 0.4145 | -0.5345 | 0.5125 |
| Methanobacterium   | 20               | 0.0339          | 0.8910     | 0.0254                         | -0.5298 | 0.4087 | -0.6452 | 0.5159 |
| Mycoplasma**       | 31               | 0.2115          | 0.0061     | 0.0021                         | -0.1728 | 0.1479 | -0.2173 | 0.1870 |
| Myxococcus         | 35               | -0.1295         | 0.6175     | 0.0022                         | -0.5001 | 0.4822 | -0.6383 | 0.6195 |
| Neisseria          | 7                | -0.1975         | 0.7513     | 0.0047                         | -0.9925 | 1.0273 | -1.1130 | 1.1478 |
| Olsenella*         | 10               | -0.7128         | 0.0434     | -0.0136                        | -0.6664 | 0.6963 | -0.8307 | 0.8406 |
| Porphyromonas      | 19               | 0.2335          | 0.5947     | 0.0105                         | -0.8129 | 0.8137 | -1.0427 | 1.0022 |
| Prevotella         | 16               | -0.0605         | 0.4226     | 0.0005                         | -0.1434 | 0.1376 | -0.1800 | 0.1743 |
| Prochlorococcus**  | 39               | 1.1848          | 0.0004     | -0.0111                        | -0.6898 | 0.7088 | -0.8749 | 0.9613 |
| Rhodobacter        | 11               | -0.6610         | 0.2201     | 0.0174                         | -1.0059 | 0.9626 | -1.2080 | 1.1494 |
| Rhodopirellula     | 20               | -0.0324         | 0.8896     | -0.0001                        | -0.4314 | 0.4406 | -0.5527 | 0.5526 |
| Ruegeria           | 10               | 0.0993          | 0.8130     | 0.0132                         | -0.7289 | 0.7006 | -0.8829 | 0.8264 |
| Selenomonas        | 6                | 0.0714          | 0.8341     | -0.0105                        | -0.5078 | 0.5365 | -0.5815 | 0.5961 |
| Shewanella         | 5                | -0.4136         | 0.3683     | -0.1669                        | -0.5762 | 0.6300 | -0.5830 | 0.6427 |
| Spirochaeta        | 5                | -0.3717         | 0.3494     | -0.0636                        | -0.5656 | 0.6806 | -0.5840 | 0.6857 |
| Spiroplasma        | 27               | 0.0754          | 0.4434     | 0.0010                         | -0.1820 | 0.1922 | -0.2282 | 0.2422 |
| Staphylococcus     | 31               | -0.0421         | 0.5624     | 0.0012                         | -0.1383 | 0.1397 | -0.1773 | 0.1762 |
| Streptococcus      | 35               | -0.1717         | 0.0833     | -0.0013                        | -0.1950 | 0.1902 | -0.2496 | 0.2395 |
| Sulfolobus         | 22               | -0.1043         | 0.2847     | 0.0045                         | -0.2001 | 0.1741 | -0.2498 | 0.2184 |
| Synechococcus*     | 26               | 0.4406          | 0.0311     | 0.0101                         | -0.3961 | 0.4050 | -0.4987 | 0.5218 |
| Thermus            | 14               | 0.2381          | 0.1727     | 0.0002                         | -0.3321 | 0.3308 | -0.4158 | 0.4118 |
| Treponema          | 8                | -0.2886         | 0.1016     | 0.0156                         | -0.3510 | 0.3098 | -0.4181 | 0.3624 |
| Vibrio             | 10               | -0.0673         | 0.4078     | 0.0080                         | -0.1620 | 0.1274 | -0.1958 | 0.1470 |
| Xylella*           | 7                | 0.3073          | 0.0055     | -0.0294                        | -0.2245 | 0.3035 | -0.2480 | 0.3182 |

Table S2: Randomized confidence intervals of slope for the phylum datasets. \* indicates datasets that show significant correlation at the  $p = 0.05$  level. \*\* indicates datasets that show significant correlation at the  $p = 0.01$  level.

| Host             | # of data points | Original sample |            | Randomized sample distribution |         |        |         |        |
|------------------|------------------|-----------------|------------|--------------------------------|---------|--------|---------|--------|
|                  |                  | Slope           | $p$ -value | Median slope                   | 95% CI  |        | 99% CI  |        |
| Actinobacteria   | 37               | -0.0387         | 0.7707     | 0.0023                         | -0.2586 | 0.2442 | -0.3272 | 0.3100 |
| Bacteroidetes**  | 39               | 0.8321          | 0.0041     | -0.0055                        | -0.5826 | 0.5808 | -0.7344 | 0.7658 |
| Chlamydiae**     | 7                | 0.7399          | 0.0075     | 0.0006                         | -0.6170 | 0.6395 | -0.7187 | 0.7155 |
| Chloroflexi      | 21               | 0.1228          | 0.6487     | 0.0089                         | -0.5191 | 0.4910 | -0.6466 | 0.6288 |
| Crenarchaeota    | 38               | 0.0248          | 0.7256     | 0.0011                         | -0.1390 | 0.1337 | -0.1856 | 0.1688 |
| Cyanobacteria**  | 39               | 1.0542          | 0          | -0.0134                        | -0.4882 | 0.5638 | -0.6186 | 0.7538 |
| D.Thermus        | 37               | 0.0556          | 0.5552     | -0.0014                        | -0.1843 | 0.1818 | -0.2347 | 0.2378 |
| Euryarchaeota    | 39               | -0.2846         | 0.2426     | 0.0174                         | -0.5383 | 0.4083 | -0.6841 | 0.5018 |
| Firmicutes       | 39               | 0.1009          | 0.6144     | 0.0106                         | -0.4091 | 0.3720 | -0.5437 | 0.4716 |
| Fusobacteria     | 37               | 0.0158          | 0.7962     | -0.0002                        | -0.1192 | 0.1190 | -0.1583 | 0.1486 |
| Nitrospirae      | 7                | 0.0545          | 0.8638     | -0.0368                        | -0.4254 | 0.5590 | -0.4767 | 0.6372 |
| Planctomycetes   | 38               | 0.0386          | 0.8012     | -0.0015                        | -0.2968 | 0.2901 | -0.3839 | 0.3797 |
| Proteobacteria** | 39               | 0.9080          | 0.0092     | -0.0032                        | -0.6980 | 0.6778 | -0.8920 | 0.8887 |
| Spirochaetes     | 38               | 0.1123          | 0.2590     | 0.0061                         | -0.2213 | 0.1780 | -0.2987 | 0.2288 |
| Synergistetes    | 7                | 0.1633          | 0.6588     | 0.0213                         | -0.5803 | 0.5610 | -0.6716 | 0.6496 |
| Tenericutes      | 39               | -0.0327         | 0.5388     | 0.0010                         | -0.1071 | 0.0999 | -0.1365 | 0.1226 |

Table S3: Randomized confidence intervals of Spearman rank for the genus datasets. \* indicates datasets that show significant correlation at the  $p = 0.05$  level. \*\* indicates datasets that show significant correlation at the  $p = 0.01$  level.

| Host               | # of data points | Original sample | Randomized sample distribution |         |        |         |        |
|--------------------|------------------|-----------------|--------------------------------|---------|--------|---------|--------|
|                    |                  | Spearman rank   | Median Spearman rank           | 95% CI  |        | 99% CI  |        |
| Acholeplasma       | 27               | -0.0956         | -0.0006                        | -0.3777 | 0.3802 | -0.4879 | 0.4840 |
| Atopobium          | 22               | -0.3604         | 0.0023                         | -0.4326 | 0.4191 | -0.5439 | 0.5445 |
| Bacillus           | 7                | 0.6429          | 0                              | -0.7500 | 0.7509 | -0.8929 | 0.8929 |
| Bifidobacterium    | 19               | 0.2000          | 0.0053                         | -0.4596 | 0.4509 | -0.5842 | 0.5825 |
| Brachyspira        | 7                | 0               | 0                              | -0.7857 | 0.7857 | -0.8929 | 0.8929 |
| Burkholderia       | 20               | 0.0707          | -0.0045                        | -0.4361 | 0.4391 | -0.5639 | 0.5669 |
| C_Pelagibacter**   | 36               | 0.7207          | 0                              | -0.3326 | 0.3318 | -0.4242 | 0.4237 |
| C_Puniceispirillum | 15               | 0.0536          | 0                              | -0.5214 | 0.5250 | -0.6643 | 0.6500 |
| Cellulophaga       | 6                | 0.6000          | 0.0286                         | -0.8286 | 0.8286 | -0.9429 | 0.9429 |
| Clostridium        | 27               | 0.1606          | 0.0018                         | -0.3791 | 0.3700 | -0.4799 | 0.4695 |
| Coprococcus        | 11               | 0.1455          | 0                              | -0.6000 | 0.6091 | -0.7545 | 0.7455 |
| Corynebacterium    | 7                | -0.0714         | 0                              | -0.7500 | 0.7500 | -0.8929 | 0.8929 |
| Croceibacter       | 24               | 0.2296          | 0.0009                         | -0.3974 | 0.4070 | -0.4965 | 0.5191 |
| Desulfovibrio      | 6                | -0.2000         | -0.0286                        | -0.8286 | 0.8286 | -0.9429 | 0.9429 |
| Exiguobacterium    | 21               | -0.0208         | 0.0029                         | -0.4333 | 0.4365 | -0.5671 | 0.5495 |
| Flavobacterium     | 22               | 0.1282          | 0.0006                         | -0.4252 | 0.4286 | -0.5449 | 0.5505 |
| Fusobacterium      | 26               | 0.3415          | 0.0024                         | -0.3962 | 0.3853 | -0.5050 | 0.4920 |
| Haloferax          | 13               | -0.0934         | 0.0055                         | -0.5604 | 0.5604 | -0.7033 | 0.6758 |
| Haloquadratum      | 9                | -0.3167         | 0                              | -0.6667 | 0.6667 | -0.8333 | 0.8000 |
| Lactobacillus      | 10               | -0.0303         | 0.0061                         | -0.6364 | 0.6364 | -0.7939 | 0.7818 |
| Leptospira         | 36               | -0.0013         | -0.0005                        | -0.3287 | 0.3326 | -0.4204 | 0.4203 |
| Leptotrichia       | 6                | -0.0286         | -0.0286                        | -0.8286 | 0.8286 | -0.9429 | 0.9429 |
| Leuconostoc        | 28               | 0.3082          | -0.0060                        | -0.3771 | 0.3766 | -0.4926 | 0.4954 |
| Magnetospirillum   | 19               | -0.2632         | 0.0053                         | -0.4579 | 0.4632 | -0.5860 | 0.5755 |
| Marinomonas        | 20               | -0.1053         | -0.0015                        | -0.4301 | 0.4467 | -0.5579 | 0.5579 |
| Methanobacterium   | 20               | -0.0586         | -0.0015                        | -0.4496 | 0.4466 | -0.5669 | 0.5805 |
| Mycoplasma*        | 31               | 0.3575          | -0.0025                        | -0.3615 | 0.3549 | -0.4621 | 0.4478 |
| Myxococcus         | 35               | -0.0050         | 0.0031                         | -0.3353 | 0.3297 | -0.4317 | 0.4266 |
| Neisseria          | 7                | -0.2143         | 0                              | -0.7500 | 0.7500 | -0.8929 | 0.8929 |
| Olsenella**        | 10               | -0.8061         | -0.0061                        | -0.6364 | 0.6364 | -0.7819 | 0.7697 |
| Porphyromonas      | 19               | 0.2140          | 0.0035                         | -0.4561 | 0.4614 | -0.5895 | 0.5930 |
| Prevotella         | 16               | -0.1824         | -0.0029                        | -0.4882 | 0.5059 | -0.6265 | 0.6500 |
| Prochlorococcus**  | 39               | 0.4063          | -0.0024                        | -0.3190 | 0.3148 | -0.4091 | 0.4006 |
| Rhodobacter        | 11               | -0.5000         | 0                              | -0.6000 | 0.6091 | -0.7364 | 0.7364 |
| Rhodopirellula     | 20               | -0.0120         | 0.0015                         | -0.4421 | 0.4466 | -0.5684 | 0.5669 |
| Ruegeria           | 10               | 0.1030          | 0.0061                         | -0.6364 | 0.6242 | -0.7455 | 0.7697 |
| Selenomonas        | 6                | -0.1429         | 0.0286                         | -0.8286 | 0.8286 | -0.9429 | 0.9429 |
| Shewanella         | 5                | -0.1000         | 0                              | -0.9000 | 0.9000 | -1.0000 | 1.0000 |
| Spirochaeta        | 5                | -0.5643         | -0.0513                        | -0.8721 | 0.8721 | -0.9747 | 0.9747 |
| Spiroplasma        | 27               | 0.2393          | 0.0055                         | -0.3816 | 0.3846 | -0.4890 | 0.4927 |
| Staphylococcus     | 31               | -0.0931         | 0.0032                         | -0.3536 | 0.3593 | -0.4677 | 0.4532 |
| Streptococcus      | 35               | -0.3129         | -0.0006                        | -0.3359 | 0.3364 | -0.4429 | 0.4384 |
| Sulfolobus         | 22               | -0.4155         | -0.0006                        | -0.4200 | 0.4200 | -0.5466 | 0.5308 |
| Synechococcus*     | 26               | 0.4865          | 0.0085                         | -0.3826 | 0.3929 | -0.4872 | 0.5036 |
| Thermus**          | 14               | 0.6967          | -0.0066                        | -0.5430 | 0.5341 | -0.6747 | 0.6747 |
| Treponema          | 8                | -0.6667         | 0                              | -0.7143 | 0.7143 | -0.8571 | 0.8571 |
| Vibrio             | 10               | -0.3697         | 0.0061                         | -0.6245 | 0.6364 | -0.7697 | 0.7697 |
| Xylella            | 7                | 0.6429          | 0                              | -0.7500 | 0.7500 | -0.8929 | 0.8929 |

Table S4: Randomized confidence intervals of Spearman rank for the phylum datasets. \* indicates datasets that show significant correlation at the  $p = 0.05$  level. \*\* indicates datasets that show significant correlation at the  $p = 0.01$  level.

| Host             | # of data points | Original sample | Randomized sample distribution |         |        |         |        |
|------------------|------------------|-----------------|--------------------------------|---------|--------|---------|--------|
|                  |                  | Spearman rank   | Median Spearman rank           | 95% CI  |        | 99% CI  |        |
| Actinobacteria   | 37               | -0.1083         | 0.0031                         | -0.3293 | 0.3208 | -0.4218 | 0.4166 |
| Bacteroidetes**  | 39               | 0.4879          | -0.0019                        | -0.3158 | 0.3156 | -0.4022 | 0.4117 |
| Chlamydiae*      | 7                | 0.8571          | 0                              | -0.7500 | 0.7500 | -0.8929 | 0.8571 |
| Chloroflexi      | 21               | 0.1403          | 0                              | -0.4390 | 0.4338 | -0.5533 | 0.5546 |
| Crenarchaeota    | 38               | 0.0780          | 0.0005                         | -0.3177 | 0.3252 | -0.4125 | 0.4187 |
| Cyanobacteria**  | 39               | 0.4287          | 0.0026                         | -0.3117 | 0.3148 | -0.4081 | 0.4273 |
| D.Thermus        | 37               | 0.0512          | -0.0019                        | -0.3284 | 0.3184 | -0.4163 | 0.4111 |
| Euryarchaeota*   | 39               | -0.3381         | 0.0004                         | -0.3166 | 0.3109 | -0.4107 | 0.4073 |
| Firmicutes       | 39               | 0.0496          | 0.0011                         | -0.3190 | 0.3152 | -0.4235 | 0.4128 |
| Fusobacteria     | 37               | -0.0441         | -0.0017                        | -0.3205 | 0.3269 | -0.4258 | 0.4227 |
| Nitrospirae      | 7                | 0               | 0                              | -0.7500 | 0.7500 | -0.8929 | 0.8929 |
| Planctomycetes   | 38               | 0.0299          | -0.0023                        | -0.3269 | 0.3220 | -0.4251 | 0.4199 |
| Proteobacteria** | 39               | 0.5700          | -0.0016                        | -0.3164 | 0.3097 | -0.4069 | 0.3945 |
| Spirochaetes     | 38               | 0.2520          | -0.0012                        | -0.3155 | 0.3207 | -0.4041 | 0.4264 |
| Synergistetes    | 7                | 0.3214          | 0                              | -0.7857 | 0.7500 | -0.8929 | 0.8929 |
| Tenericutes      | 39               | -0.1405         | -0.0010                        | -0.3130 | 0.3166 | -0.4105 | 0.4024 |
